# Supplementary material
Source: publisher figshare collection journal article supplement (https://tandf.figshare.com/ndownloader/files/13264172)
Supplement: Supplementary file 1 [file 13264172]

**Supplementary Table I. Antimicrobial therapy in 23 episodes of Non-Typhoidal Salmonellosis in 22 adult SCD patients.**

| **Details on antimicrobial therapy** | | |  | **n=23** |
| --- | --- | --- | --- | --- |
| **Adequate initial antibiotherapy** n=22 | | |  | 18/22 (82) |
| **Main first line-therapy** | |  |  |  |
|  | amoxicillin |  |  | 3 (13) |
|  | amoxicillin-clavulanate | |  | 4 (17) |
|  | third-generation cephalosporins | | | 13 (57) |
|  | others |  |  | 3 (13) |
| **Initial combination therapy (betalactam + FQ/AG)** | | | | 8 (35) |
| **Main second-line therapy** | |  |  |  |
|  | fluoroquinolones | |  | 17 (74) |
|  | trimethoprim/sulfamethoxazole | | | 3 (13) |
|  | third-generation cephalosporins | | | 2 (9) |
|  | amoxicillin |  |  | 1 (4) |
| **Median duration of antibiotic therapy (days), median [range]** | | | | 44 [7-102] |
| **Median time until the resolution of fever (days), median [range]** | | | | 8.5 [1-85] |
| NOTE. AG: aminoglycoside; FQ: fluoroquinolone;  Data are n (%) unless otherwise indicated. n: number of data analysed | | | | |
